# Supplementary material for: The specific use of alginate fromLaminaria japonicabyBacteroidesspecies determined its modulation of theBacteroidescommunity
Source: Royal Society of Chemistry journal article supplement (doi:10.1039/c9fo00289h), 2019-01-01

## Supporting information

**Table S1** Strains used in specificity analysis of LJP-A use in *Bacteroides* species.

**Table S2** Components of the gut microbiota medium (GMM).

**Fig. S1** Chemical composition of LJP-A was analyzed by HPLC (A) after PMP derivatization, <sup>1</sup>H-NMR and <sup>13</sup>C-NMR (B), and CD spectrum (C).

**Fig. S2** Correlation analysis between the gut microbiota, LJP-A utilization and SCFAs production by Spearman's correlation test.

**Fig. S3** Heatmap showing the relative abundances of 38 OTUs altered by LJP-A.

**Table S1** Strains used in specificity analysis of LJP-A use in *Bacteroides* species.

| Species                             | Strain  | Source           | GeneBank number |
|-------------------------------------|---------|------------------|-----------------|
| <i>Bacteroides ovatus</i>           | DM-BO11 | Other individual | MK742889        |
| <i>Bacteroides caccae</i>           | DM-BC2  | Individual#1     | MK743932        |
| <i>Bacteroides vulgatus</i>         | DM-BV13 | Individual#2     | MK743934        |
| <i>Bacteroides finegoldii</i>       | DM-BF4  | Individual#3     | MK743931        |
| <i>Bacteroides stercoris</i>        | DM-BS25 | Other individual | MK743935        |
| <i>Bacteroides uniformis</i>        | DM-BU6  | Individual#3     | MK696409        |
| <i>Bacteroides thetaiotaomicron</i> | DM-BT7  | Individual#3     | MK742887        |
| <i>Parabacteroides distasonis</i>   | DM-PD18 | Individual#2     | MK696408        |
| <i>Parabacteroides goldsteinii</i>  | DM-PG9  | Individual#1     | MK696407        |
| <i>Parabacteroides johnsonii</i>    | DM-PJ29 | Individual#2     | MK743930        |

**Table S2** Components of the gut microbiota medium (GMM) with 0.5% of LJP-A.

| <b>Components</b>                    | <b>Amount/L</b> | <b>Concentration</b> |
|--------------------------------------|-----------------|----------------------|
| Tryptone Peptone                     | 2 g             | 0.2%                 |
| Yeast Extract                        | 1 g             | 0.1%                 |
| LJP-A                                | 0.5 g           | 0.5%                 |
| L-cysteine                           | 0.5 g           | 3.2 mM               |
| Meat Extract                         | 5 g             | 0.5%                 |
| KH <sub>2</sub> PO <sub>4</sub>      | 100 mL          | 100 mM               |
| MgSO <sub>4</sub> -7H <sub>2</sub> O | 0.002 g         | 0.008 mM             |
| NaHCO <sub>3</sub>                   | 0.4 g           | 4.8 mM               |
| NaCl                                 | 0.08 g          | 1.37 mM              |
| CaCl <sub>2</sub>                    | 1 mL            | 0.80%                |
| Vitamin K (menadione)                | 1 mL            | 5.8 mM               |
| FeSO <sub>4</sub>                    | 1 mL            | 1.44 mM              |
| Histidine Hematin Solution           | 1 mL            | 0.1%                 |
| Tween 80                             | 2 mL            | 0.05%                |
| ATCC Vitamin Mix                     | 10 mL           | 1%                   |
| ATCC Trace Mineral Mix               | 10 mL           | 1%                   |
| Resazurin                            | 4 mL            | 4 mM                 |

**Fig. S1**  
A

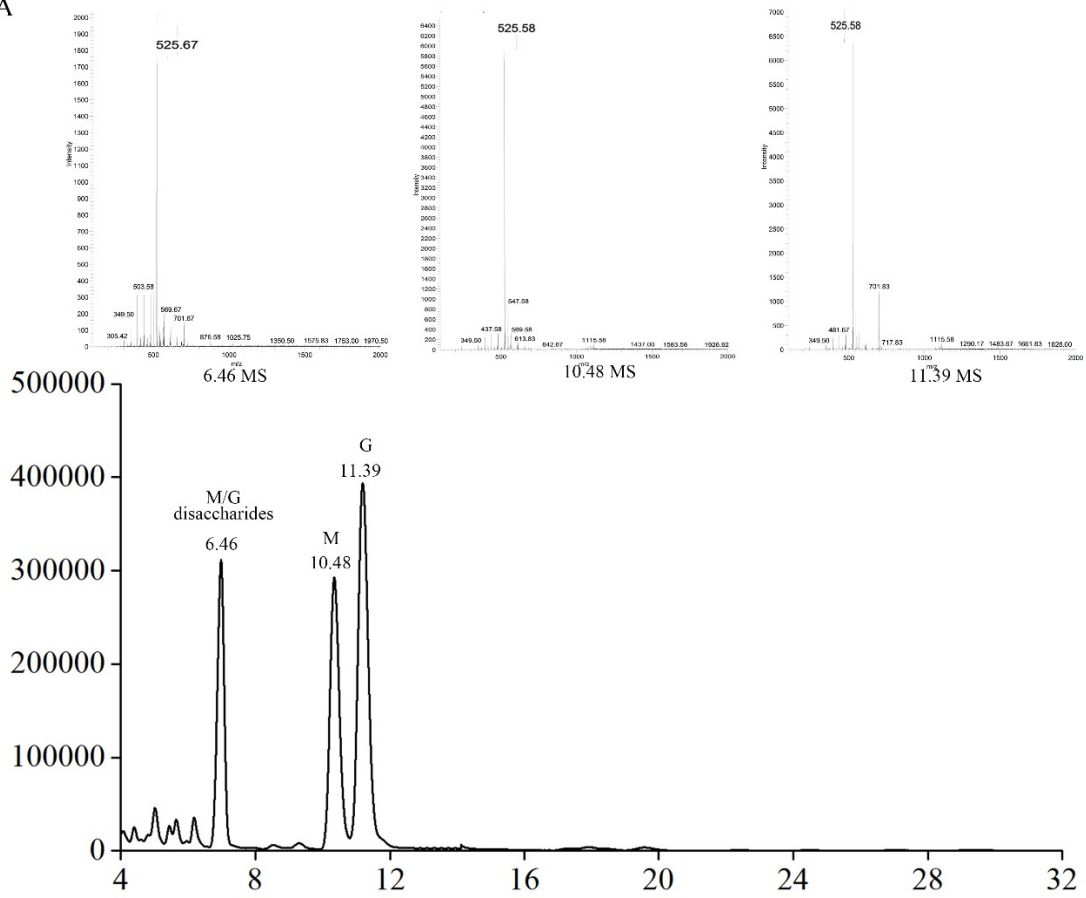

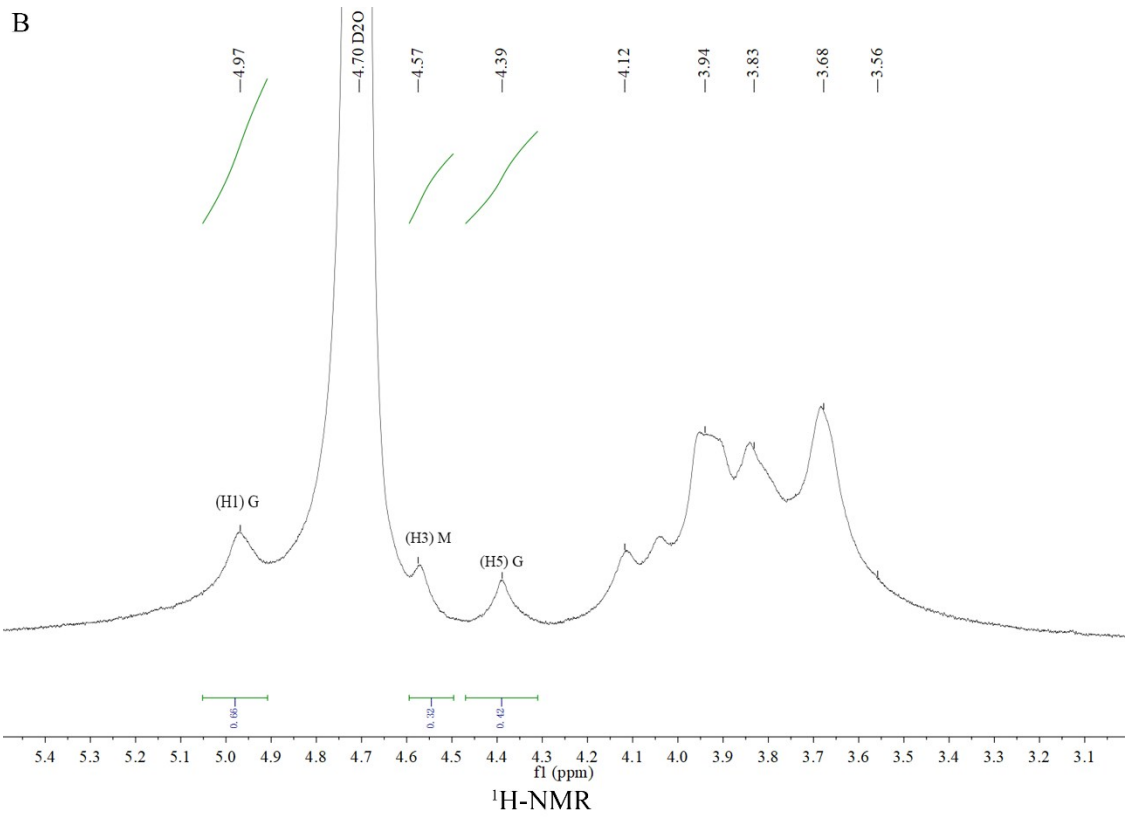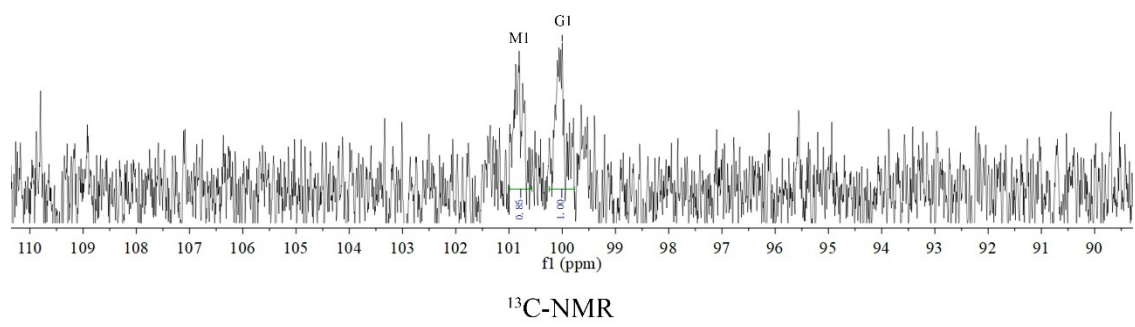

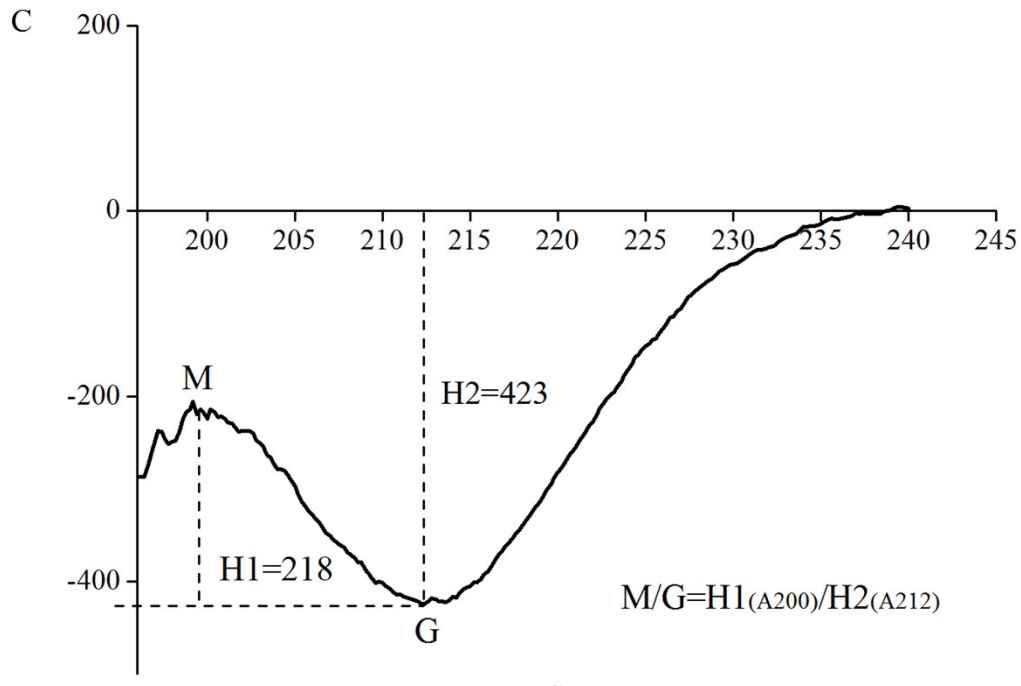

CD spectrum

Fig. S2

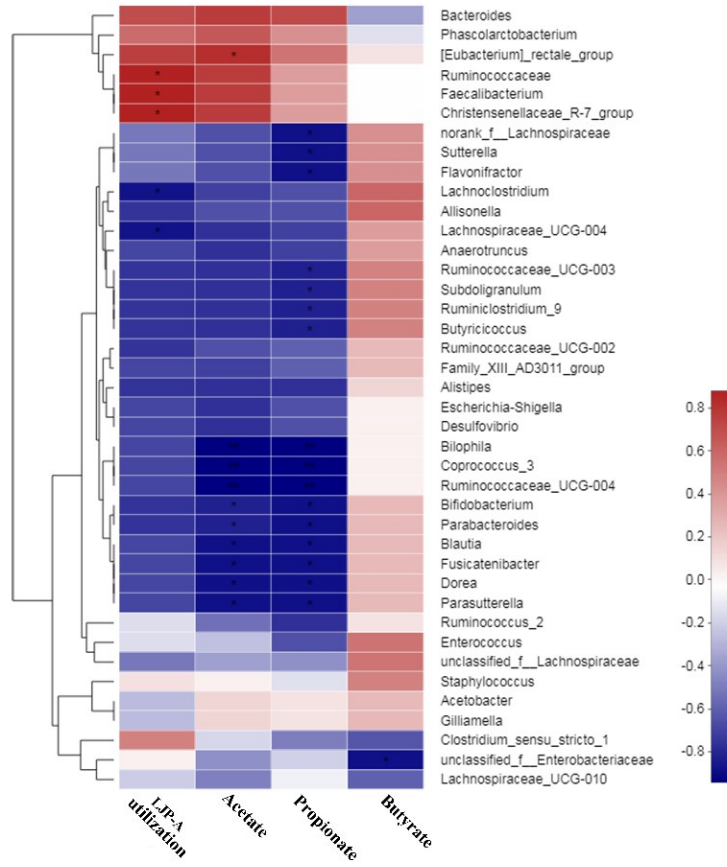

Fig. S3

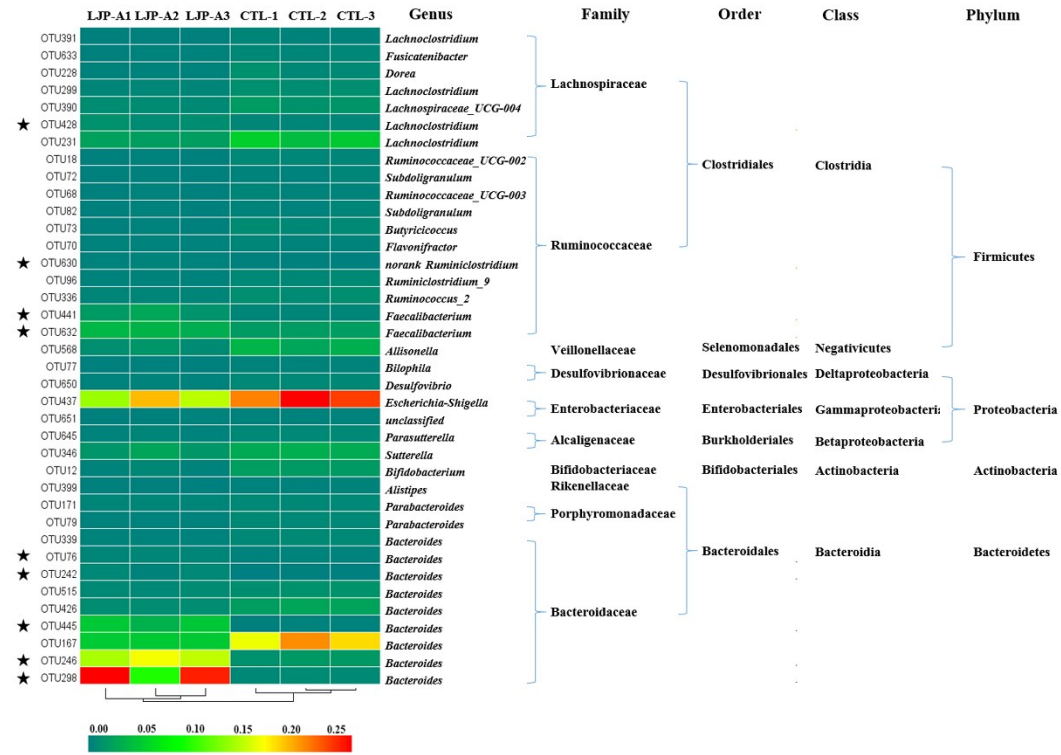

Supplement: c9fo00289h1.pdf [file c9fo00289h1.pdf]
